# Supplementary material for: Quintuple perovskites Ln2Ba3Fe5−xCoxO15−δ(Ln = Sm, Eu): nanoscale ordering and unconventional magnetism
Source: Royal Society of Chemistry journal article supplement (doi:10.1039/c5tc00494b), 2015-01-01
Supplement: c5tc00494b1.pdf [file c5tc00494b1.pdf]

Supplementary information:

The PXRD patterns registered with Cu K $\alpha$  of the different Sm- and Eu-samples are given in figures S1, S2, S5 and S6 together with the fits obtained from Rietveld refinements in the cubic space group (Pm-3m). Note that for the  $\text{Eu}_2\text{Ba}_3\text{Fe}_{3.5}\text{Co}_{1.5}\text{O}_{13.81}$ , which is slightly more distorted a refinement was also carried out in the tetragonal space group P4/mmm (figures S3 and S4).

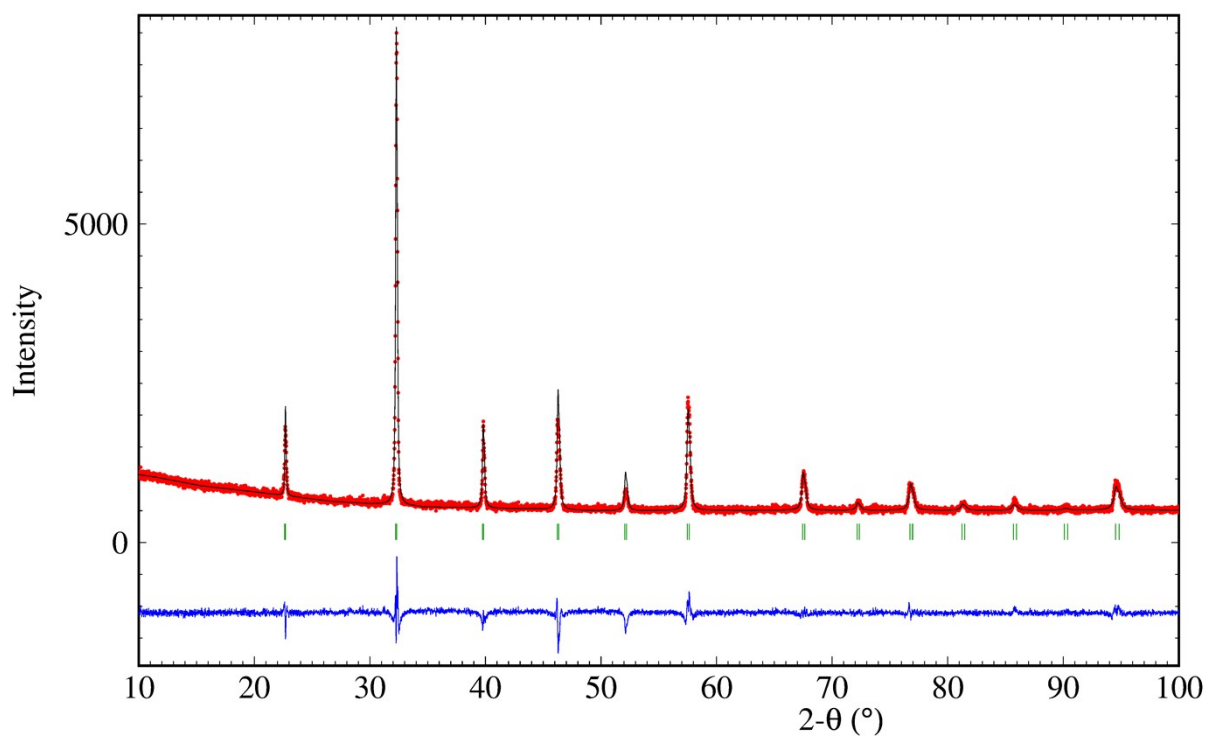

Figure 1 : Rietveld refinement of  $\text{Eu}_2\text{Ba}_3\text{Fe}_{3.5}\text{Co}_{1.5}\text{O}_{13.81}$  with cubic symmetry (S.G. : Pm-3m)

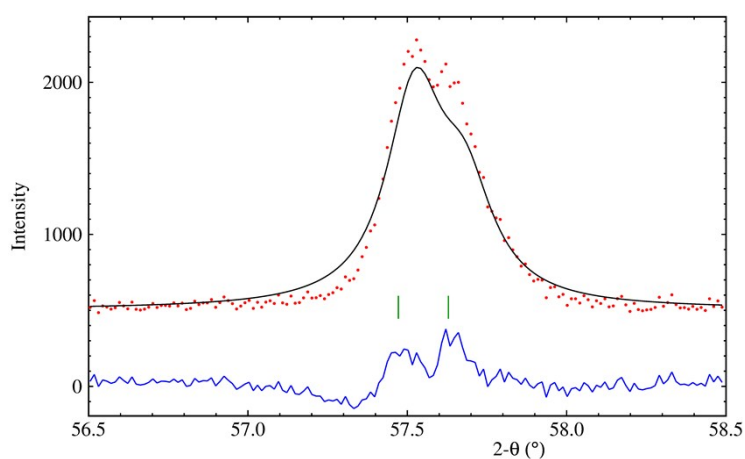

Figure 2: Enlargement of (211) reflection for  $\text{Eu}_2\text{Ba}_3\text{Fe}_{3.5}\text{Co}_{1.5}\text{O}_{13.81}$  with cubic symmetry

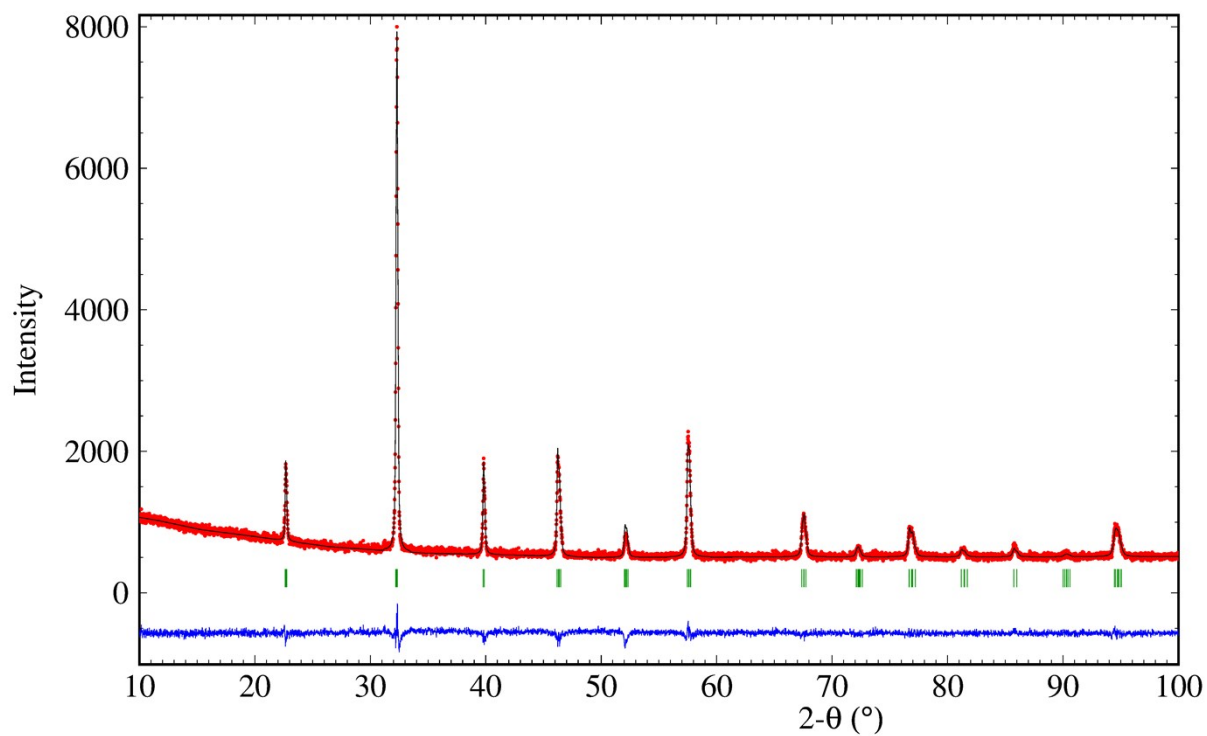

Figure 3: Rietveld refinement of  $\text{Eu}_2\text{Ba}_3\text{Fe}_{3.5}\text{Co}_{1.5}\text{O}_{13.81}$  with tetragonal symmetry (S.G. : P4/mmm)

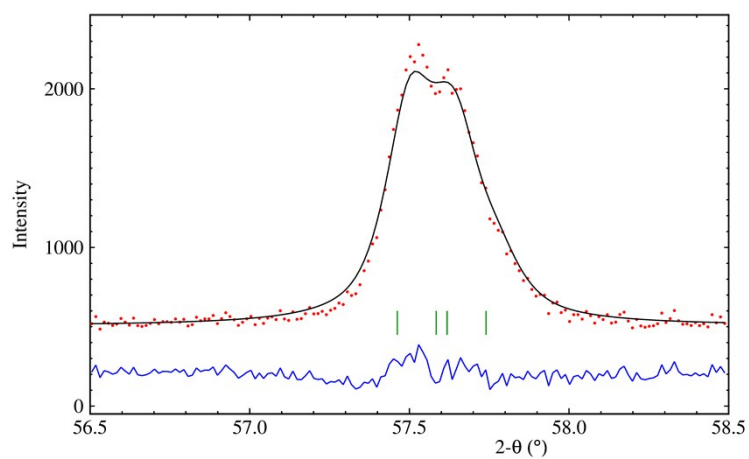

Figure 4: Enlargements of (211) and (112) reflections for  $\text{Eu}_2\text{Ba}_3\text{Fe}_{3.5}\text{Co}_{1.5}\text{O}_{13.81}$  with tetragonal symmetry.

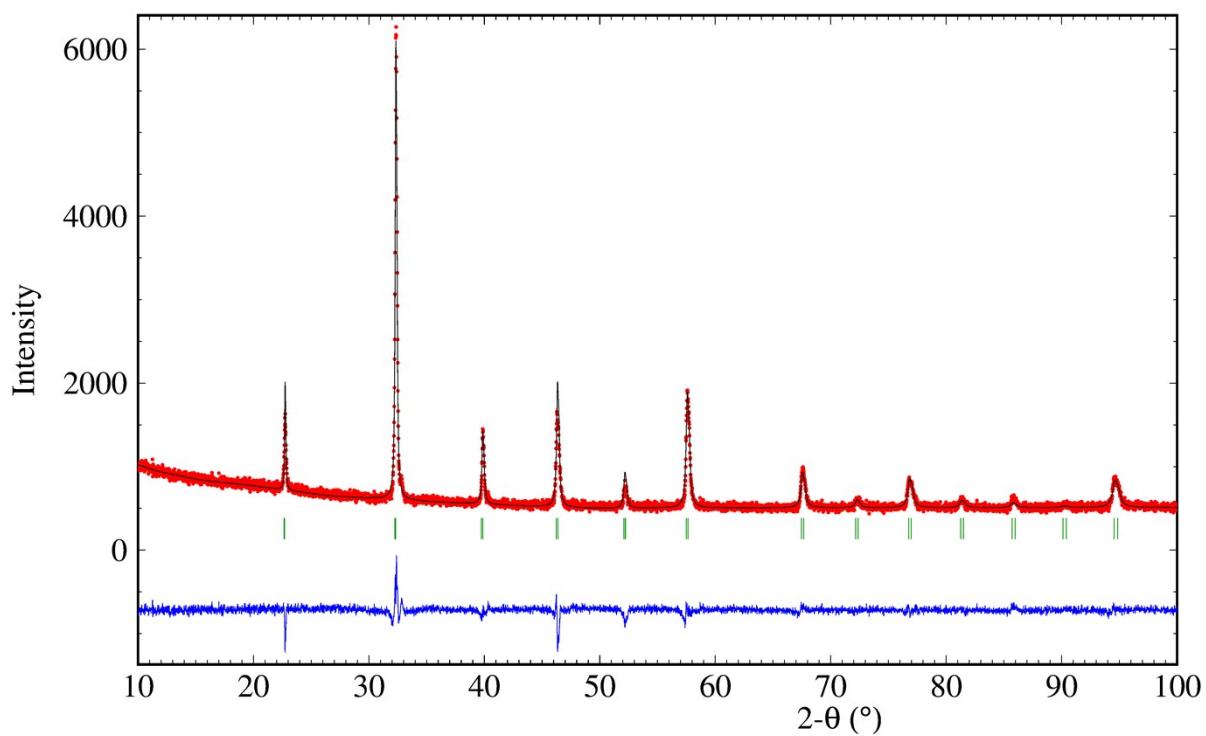

Figure 5 : Rietveld refinement of  $\text{Eu}_2\text{Ba}_3\text{Fe}_3\text{Co}_2\text{O}_{13.72}$  with cubic symmetry (S.G. : Pm-3m)

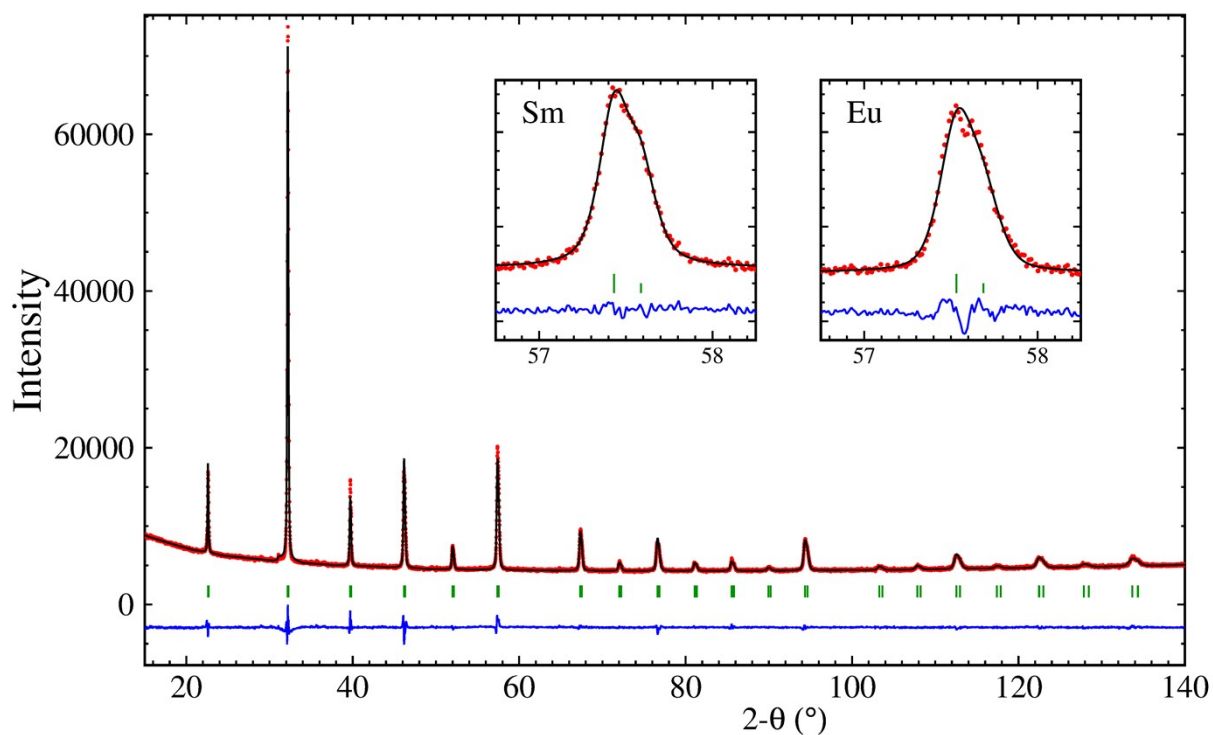

Figure 6: Rietveld refinement of  $\text{Sm}_2\text{Ba}_3\text{Fe}_{3.5}\text{Co}_{1.5}\text{O}_{14.16}$ . Insets are showing enlargements of 211 peaks of  $\text{Sm}_2\text{Ba}_3\text{Fe}_{3.5}\text{Co}_{1.5}\text{O}_{14.16}$  and  $\text{Eu}_2\text{Ba}_3\text{Fe}_{3.5}\text{Co}_{1.5}\text{O}_{13.81}$  phases for comparisons.
